# Supplementary material for: A Narrative Review on the Human Health Effects of Ambient Air Pollution in Sub-Saharan Africa: An Urgent Need for Health Effects Studies
Source: MDPI journal article supplement (doi:10.3390/ijerph15030427), 2018-03-01
Supplement: s1 [file s1]

Table S1. Tabular summary of studies that met the inclusion criteria.

| Title and author [reference#]                                                                                                                                               | Year | Country                                                  | Time-frame                   | Type                                                                           | Study Population                                                           | Health Outcome/s                                                                                                                                         | Exposure variables                                                                     | Statistical Analysis                                  | Key findings – adjusted Odds Ratios (95%CI) or $\beta$ (95%CI) or adjusted hazards ratios (HR)                                                                                                                                                                                 | Assessed for interaction with socioeconomic or other risk factors?              | Multi-pollutant models?                                                                  | Controlled for indoor fuel use? |
|-----------------------------------------------------------------------------------------------------------------------------------------------------------------------------|------|----------------------------------------------------------|------------------------------|--------------------------------------------------------------------------------|----------------------------------------------------------------------------|----------------------------------------------------------------------------------------------------------------------------------------------------------|----------------------------------------------------------------------------------------|-------------------------------------------------------|--------------------------------------------------------------------------------------------------------------------------------------------------------------------------------------------------------------------------------------------------------------------------------|---------------------------------------------------------------------------------|------------------------------------------------------------------------------------------|---------------------------------|
| <b>Acute respiratory symptoms associated with short term fluctuations in ambient pollutants among schoolchildren in Durban, South Africa; Mentz et al. [20]<sup>a</sup></b> | 2017 | Durban, South Africa                                     | Not indicated in publication | Longitudinal panel study of children from different schools followed over time | N = 423 school children, 44% African, 23% mixed race, 28% Indian, 6% white | Acute respiratory – cough, wheeze, shortness of breath, chest tightness/heaviness, any symptoms; outcomes ascertained with daily logs recorded bi-hourly | PM10, SO2, NO2, NO measured at 8 monitoring sites and at each school                   | GEE; 0 – 5 day lags; single lags and distributed lags | PM10 - $\uparrow$ cough, $\uparrow$ SOB, $\uparrow$ chest; SO2 - $\uparrow$ cough, $\uparrow$ SOB, $\uparrow$ chest; NO2 - $\uparrow$ cough, $\uparrow$ wheeze, $\uparrow$ SOB, $\uparrow$ chest; NO - $\uparrow$ cough, $\downarrow$ wheeze, $\uparrow$ SOB, $\uparrow$ chest | No                                                                              | Yes, but bi-pollutant model results not presented due to problems from multicollinearity | No                              |
| <b>Ambient pollution and respiratory outcomes among schoolchildren in Durban, South Africa; Naidoo et al. [26]</b>                                                          | 2013 | Durban, South Africa                                     | Not indicated in publication | Cross-sectional study of children from different schools                       | N = 341 school children, 41% black, 22% coloured, 26% Indian, 11% white    | Chronic – cough, phlegm, bronchitis, wheezing, wheezing + SOB, Stuffy/runny nose, watery/itchy eyes, asthma, airway hyperreactivity                      | PM10, SO2, NO2, NO measured at 8 monitoring sites and at each school                   | Logistic regression                                   | SO2~ airway hyperreactivity HR=2.14 (0.98, 4.66)                                                                                                                                                                                                                               | No                                                                              | No                                                                                       | No                              |
| <b>Ambient PM2.5 and Stroke Effect Modifiers and Population Attributable Risk in Six Low- and Middle-Income Countries; Lin et al. [22]</b>                                  | 2017 | <b>South Africa, Ghana, China, India, Mexico, Russia</b> | 2007-2010                    | Cross-sectional/household surveys                                              | N = 45,625                                                                 | Stroke – based on self-report over the past 12-months                                                                                                    | PM2.5 – yearly averages derived from satellite-derived aerosol optical depth estimates | Logistic regression – 3-level multilevel model        | PM2.5 ~ Stroke: OR=1.13 (1.04-1.22)                                                                                                                                                                                                                                            | Yes – sex, age, smoking*, physical activity*, fruit* and vegetable* consumption | No                                                                                       | Yes                             |
| <b>Exposure to air pollution and tobacco</b>                                                                                                                                | 2017 | <b>South Africa, Ghana,</b>                              | 2007-2010                    | Cross-sectional/household surveys                                              | N = 41,785                                                                 | Depression                                                                                                                                               | PM2.5 – yearly averages                                                                | Logistic regression – 3-level                         | PM2.5 ~ depression symptoms:                                                                                                                                                                                                                                                   | Yes – smoking*                                                                  | No                                                                                       | Yes                             |

|                                                                                                                                                           |      |                                                   |           |                                                                  |                                                                       |                                                                                                       |                                                                                        |                                               |                                                                                                                                                                                                                                                                                                                                 |                                                                |    |     |
|-----------------------------------------------------------------------------------------------------------------------------------------------------------|------|---------------------------------------------------|-----------|------------------------------------------------------------------|-----------------------------------------------------------------------|-------------------------------------------------------------------------------------------------------|----------------------------------------------------------------------------------------|-----------------------------------------------|---------------------------------------------------------------------------------------------------------------------------------------------------------------------------------------------------------------------------------------------------------------------------------------------------------------------------------|----------------------------------------------------------------|----|-----|
| smoking and their combined effects on depression in six low- and middle-income countries. Lin et al. [29]                                                 |      | China, India, Mexico, Russia                      |           |                                                                  |                                                                       |                                                                                                       | derived from satellite-derived aerosol optical depth estimates                         | multilevel model                              | OR=1.09 (1.01, 1.17)                                                                                                                                                                                                                                                                                                            |                                                                |    |     |
| Exposure to ambient PM2.5 associated with overall and domain-specific disability among adults in six low- and middle-income countries; Lin et al. [30]    | 2017 | South Africa, Ghana, China, India, Mexico, Russia | 2007-2010 | Cross-sectional/household surveys                                | N = 45,625                                                            | Disability Score                                                                                      | PM2.5 – yearly averages derived from satellite-derived aerosol optical depth estimates | Linear regression – 3-level multilevel model  | PM2.5 ~ WHO Disability Score: $\beta=0.72$ (0.22, 1.22)                                                                                                                                                                                                                                                                         | Yes – sex and age                                              | No | Yes |
| Ambient Air Pollution Exposure and Respiratory, Cardiovascular and Cerebrovascular Mortality in Cape Town, South Africa: 2001–2006; Wichmann & Vuyi. [23] | 2012 | Cape Town, South Africa                           | 2001-2006 | Case-crossover using mortality data from local municipal records | N = 149,667 (respiratory disease = 13,439; CVD = 21,569; CBD = 7,594) | Mortality – respiratory disease (RD); cardiovascular disease (CVD); and cerebrovascular disease (CBD) | NO2, SO2, and PM10 measured daily at three government monitoring sites                 | Logistic regression; tested zero – 5-day lags | NO2~CVD: $\beta=3.4$ (0.3, 6.6); SO2~CVD: $\beta=2.6$ (0.1, 5.2); PM10~ CBD: $\beta=4.1$ (0.4, 8.1); NO2~CBD: $\beta=8.0$ (2.9, 13.4); PM10~RD (warm temps): $\beta=5.5$ (1.4, 9.6); NO2~RD (warm temps): $\beta=6.0$ (1.0, 11.2); PM10~CVD (warm temps): $\beta=4.1$ (1.0, 7.2); NO2~CBD (warm temps): $\beta=9.0$ (2.4, 16.0) | Yes – seasonal temperatures, sex, age, distance from monitors* | No | No  |
| The effects of air pollution on human                                                                                                                     | 2016 | 35 African countries                              | 1995-2011 | Longitudinal, population-based panel study (ecological)          | Not given in publication                                              | Mortality rate – stratified by male and female adults,                                                | PM10 and CO2 emissions per capita                                                      | Generalized method of                         | PM10 – 0.017% to 0.028% male and 0.024% to                                                                                                                                                                                                                                                                                      | Yes – sex and government effectiveness                         | No | No  |

|                                                                                                                                                          |      |                                                                                                     |                      |                              |                                         |                                                                                                  |                                                                                                                                                             |                                                                                |                                                                                                                                             |    |                                                             |     |
|----------------------------------------------------------------------------------------------------------------------------------------------------------|------|-----------------------------------------------------------------------------------------------------|----------------------|------------------------------|-----------------------------------------|--------------------------------------------------------------------------------------------------|-------------------------------------------------------------------------------------------------------------------------------------------------------------|--------------------------------------------------------------------------------|---------------------------------------------------------------------------------------------------------------------------------------------|----|-------------------------------------------------------------|-----|
| <b>mortality: does gender difference matter in African countries?; Aliyu &amp; Ismail. [24]</b>                                                          |      |                                                                                                     |                      |                              |                                         | infants, and under-5 mortality                                                                   | (source of these data were not well described)                                                                                                              | moment regression                                                              | 0.031% female adult mortality; 0.33% infant and 1.33% under-5 mortality                                                                     |    |                                                             |     |
| <b>Traffic Air Pollution and Other Risk Factors for Respiratory Illness in Schoolchildren in the Niger-Delta Region of Nigeria; Mustapha et al. [27]</b> | 2011 | Nigeria municipalities: Warri, Ebrumede, Effurun, jeddo, Ubeji, Otor-Udu, Owrode, Ovu, Udu, and Edu | March – June 2004    | Cross-sectional survey study | N = 1,397 schoolchildren (7 – 14 years) | Wheeze (past 12 months); Night cough (past 12 months); Phlegm; Rhinitis; Asthma (ever diagnosed) | PM (of various size fractions) and CO. Note: exposure metric based on a principal component analysis that combined air measurements with traffic indicators | Logistic regression                                                            | Traffic pollution component ~ phlegm: OR=1.15 (0.89, 1.49); Fine particulates/trucks component ~ phlegm: OR=1.38 (1.09-1.75)                | No | Yes – use of PCA may constitute a multi-pollutant framework | Yes |
| <b>Outdoor respirable particulate matter and the lung function status of residents of selected communities in Ibadan, Nigeria; Ana et al. [28]</b>       | 2014 | Ibadan, Nigeria                                                                                     | January – March 2008 | Cross-sectional study        | N = 140, ages 15-65 years               | FEV1 observed and % predicted FEV1 as determined by observed FEV1/predicted FEV1                 | PM10                                                                                                                                                        | Spearman rank correlation test                                                 | PM10 ~ FEV1: Pearson correlation = -0.371 (p < .05)                                                                                         | No | No                                                          | No  |
| <b>The Associations between Types of Ambient PM2.5 and Under-Five and Maternal Mortality in Africa; Owili et al. [25]</b>                                | 2017 | All African countries                                                                               | 2000-2015            | Ecological study             | Not given in publication                | Under-five mortality and Maternal mortality                                                      | Annual PM2.5 pollution type (biomass, anthropogenic, dust, mixture) as derived from monthly                                                                 | Generalized Linear and Additive Mixed-Effect models with Poisson link function | Biomass PM2.5~Under-5 deaths: $\beta=0.99$ (0.98, 1.02) and Maternal deaths: $\beta=0.94$ (0.88, 0.99); Anthropogenic PM2.5~Under-5 deaths: | No | No                                                          | No  |

|                                                                                                                                                                                    |      |                                                     |                                                           |                                                  |                                                              |                                                                     |                                                                                                                                              |                                                                                                           |                                                                                                                                                                                                                                                                                |                                     |    |    |
|------------------------------------------------------------------------------------------------------------------------------------------------------------------------------------|------|-----------------------------------------------------|-----------------------------------------------------------|--------------------------------------------------|--------------------------------------------------------------|---------------------------------------------------------------------|----------------------------------------------------------------------------------------------------------------------------------------------|-----------------------------------------------------------------------------------------------------------|--------------------------------------------------------------------------------------------------------------------------------------------------------------------------------------------------------------------------------------------------------------------------------|-------------------------------------|----|----|
|                                                                                                                                                                                    |      |                                                     |                                                           |                                                  |                                                              |                                                                     | spectral aerosol optical depth satellite data to estimate concentrations for African sub-region                                              |                                                                                                           | $\beta=1.01$ (1.01, 1.02) and Maternal deaths: $\beta=1.03$ (1.01, 1.05); Dust PM2.5~ Under-5 deaths: $\beta=0.98$ (0.97, 0.98) and Maternal deaths: 0.93 (0.91, 0.95); Mixture PM2.5~Under-5 deaths: $\beta=0.94$ (0.94, 0.94) and Maternal deaths: $\beta=0.95$ (0.92, 0.98) |                                     |    |    |
| <b>Outdoor Air Pollution, Preterm Birth, and Low Birth Weight: Analysis of the World Health Organization Global Survey on Maternal and Perinatal Health; Fleischer et al. [31]</b> | 2014 | Democratic Republic of Congo, Kenya, Niger, Nigeria | Sept. 2004 – March 2005                                   | Cross-sectional health facility study            | N=192,900 with n=35,125 from SSA countries                   | Low birth weight and Preterm birth                                  | Seasonally adjusted long-term average PM2.5 estimates estimated around study clinics (50-km buffers). Estimates derived from satellite data. | Generalized estimating equations accounting for clinic correlation in birth outcomes                      | PM2.5 (3 <sup>rd</sup> Quartile vs. 1 <sup>st</sup> Quartile) ~ low birth weight: OR=1.15 (1.02, 1.30)<br><br>PM2.5 (4 <sup>th</sup> Quartile vs. 1 <sup>st</sup> Quartile) ~ low birth weight: OR=1.15 (1.01, 1.32)                                                           | No                                  | No | No |
| <b>Interaction between ambient pollutant exposure, CD14 (-159) polymorphism and respiratory outcomes among children</b>                                                            | 2017 | Durban, South Africa                                | 3-weeks during different seasons (study year not given in | Prospective cohort at schools with questionnaire | N=71, Children ages 7 – 9 recruited from 7 different schools | Repeated measures of within-day variability in Lung function (FEV1) | Daily concentrations of NO2, NO, SO2, and PM from continuous air monitoring; NO and NO2 measured at 7                                        | Linear multivariate generalized estimated equations to account for correlation of FEV1 within participant | No overall associations between pollutants and within-day lung function; Significant gene-environment interaction (CD14 polymorphisms) for NO and                                                                                                                              | Yes – By CD14 polymorphism genotype | No | No |

|                                                |  |  |               |  |  |  |                                                                                                 |  |                                  |  |  |  |
|------------------------------------------------|--|--|---------------|--|--|--|-------------------------------------------------------------------------------------------------|--|----------------------------------|--|--|--|
| in Kwazulu-Natal, Durban; Makamure et al. [21] |  |  | public ation) |  |  |  | monitoring sites; SO2 at 16 sites (including all 7 schools); PM10 at 12 sites (and each school) |  | NO2 on within-day lung function; |  |  |  |
|------------------------------------------------|--|--|---------------|--|--|--|-------------------------------------------------------------------------------------------------|--|----------------------------------|--|--|--|

<sup>a</sup>Due to the large number of statistical comparisons related to multiple day lag tests, it is impractical to detail each effect estimate size in this table and we have therefore simply indicated the direction of the statistically significant association. The reader is referred to the original article to obtain the effect estimate size.

Table S2. Tabular summary of notable studies that did not meet the inclusion criteria.

| Title, Author, and Year published                                                                                                                                                | Country and Study Population                          | Health Outcomes, Pollutant Measured, and Outdoor Air Pollution Exposure Proxies                                                                                                                          | Key Findings                                                                                                                                                                                                            |
|----------------------------------------------------------------------------------------------------------------------------------------------------------------------------------|-------------------------------------------------------|----------------------------------------------------------------------------------------------------------------------------------------------------------------------------------------------------------|-------------------------------------------------------------------------------------------------------------------------------------------------------------------------------------------------------------------------|
| Urban city transportation mode and respiratory health effect of air pollution: a cross-sectional study among transit and non-transit workers in Nigeria.; Ekpenyong et al.; 2012 | Nigeria; N=168 adult participants from Uyo metropolis | Outcomes: Lung function impairment (FVC and FEV) – GOLD and NICE criteria<br><br>Pollutants Measured: None<br><br>Exposure Proxies: Transit workers (motorcyclists/taxi drivers) and civil servants      | Motorcyclists showed the highest odds of lung function impairment<br><br>Uneducated and smoking transit workers who worked for more than a year and had frequent and lengthy trips had highest lung function impairment |
| Air pollution and respiratory disease in a tropical urban setting in Cotonou, Benin; Agodokpessi et al.; 2011                                                                    | Cotonou, Benin; residents from 60 homes               | Outcomes: Lung function spirometry, respiratory symptoms<br><br>Pollutants Measured: NO2, SO2, and CO<br><br>Exposure Proxies: Heavy vs. Light traffic                                                   | Spirometry abnormalities as well as respiratory symptoms significantly higher during heavy versus light traffic                                                                                                         |
| Air pollution in urban area in Cotonou and Lokossa, Benin; Fourn & Fayomi; 2006                                                                                                  | Cotonou and Lokossa, Benin, 400 taxi drivers          | Outcomes: Intoxication symptoms (e.g., respiratory, lacrimation) and carboxyhemoglobin<br><br>Pollutants Measured: Benzene, CO<br><br>Exposure Proxies: Motorcycle drivers versus non-Motorcycle drivers | Motorcycle drivers accounted for 90% of intoxication cases, Hbco levels were abnormal in 66% of drivers                                                                                                                 |

|                                                                                                                                                                                                  |                                                                                                             |                                                                                                                                                                                                                                              |                                                                                                                                                                                                               |
|--------------------------------------------------------------------------------------------------------------------------------------------------------------------------------------------------|-------------------------------------------------------------------------------------------------------------|----------------------------------------------------------------------------------------------------------------------------------------------------------------------------------------------------------------------------------------------|---------------------------------------------------------------------------------------------------------------------------------------------------------------------------------------------------------------|
| <p>The Burden of Hypertension in an Oil- and Gas-Polluted Environment: A Comparative Cross-Sectional Study; Ezejimofor et al.;2016</p>                                                           | <p>Niger River Delta Region of Nigeria; N=2028 adults</p>                                                   | <p>Outcomes: Hypertension<br/>Pollutants Measured: None<br/>Exposure Proxies: Polluted versus non-Polluted areas</p>                                                                                                                         | <p>5-times higher odds of hypertension living in polluted area with increased risk of pollution effects with increasing age</p>                                                                               |
| <p>Association between wheeze and selected air pollution sources in an air pollution priority area in South Africa: a cross-sectional study; Shirinde et al.;2014</p>                            | <p>Ekurhuleni Metropolitan Municipality, South Africa; N=3468 schoolchildren ages 13-14</p>                 | <p>Health Outcomes: respiratory indicators from ISAAC questionnaire<br/>Pollutants Measured: None<br/>Exposure Proxy: Frequency of trucks passing nearby home; mode of transportation to school</p>                                          | <p>Wheeze ever, current wheeze, and current severe wheeze significantly associated with higher frequency of trucks passing by children's home</p>                                                             |
| <p>Allergic rhinitis, rhinoconjunctivitis and hayfever symptoms among children are associated with frequency of truck traffic near residences: a cross sectional study; Shirinde et al.;2015</p> | <p>Ekurhuleni Metropolitan Municipality, South Africa; N=3424 schoolchildren ages 13-14</p>                 | <p>Health Outcomes: rhinitis ever, current rhinitis rhinoconjunctivitis and hayfever from ISAAC questionnaire<br/>Pollutants Measured: None<br/>Exposure Proxy: Frequency of trucks passing nearby home mode of transportation to school</p> | <p>Current rhinitis and current rhinoconjunctivitis were significantly associated with higher frequency of trucks passing by children's home</p>                                                              |
| <p>Self-reported truck traffic on the street of residence and symptoms of asthma and allergic disease: a global relationship in ISAAC phase 3.; Brunekreef et al.; 2009</p>                      | <p>Five African countries; N= 16,914 schoolchildren ages 6-7 and 13-14 years</p>                            | <p>Health Outcomes: symptoms of asthma, rhinoconjunctivitis, and eczema from ISAAC questionnaire<br/>Pollutants Measured: None<br/>Exposure Proxy: Frequency of trucks passing nearby home</p>                                               | <p>Odds ratios (95% confidence intervals) for current wheeze and almost the whole day versus never truck traffic were 1.35 (1.23-1.49) for 13- to 14-year-olds and 1.35 (1.22-1.48) for 6- to 7-year-olds</p> |
| <p>Meteorologically estimated exposure but not distance predicts asthma symptoms in schoolchildren in the environs of a petrochemical refinery: a cross-sectional study; White et al.; 2009</p>  | <p>Cape Town, South Africa; N=2,361 school children ages 11-14 years living near petrochemical facility</p> | <p>Health Outcomes: Asthma symptoms from ISAAC questionnaire<br/>Pollutants Measured: None<br/>Exposure Proxy: Distance and meteorology (wind direction/speed) from petrochemical facility</p>                                               | <p>Meteorological (but not distance) exposure estimates significantly associated with higher inhaler use and recent waking with wheeze and wheeze during resting.</p>                                         |
